# Supplementary material for: Coupling of H3K27me3 recognition with transcriptional repression through the BAH-PHD-CPL2 complex in Arabidopsis
Source: PubMed Central journal article supplement (PMC7718874; doi:10.1038/s41467-020-20089-0), 2020-12-04
Supplement: 41467_2020_20089_MOESM3_ESM.pdf [file 41467_2020_20089_MOESM3_ESM.pdf]

## **Descriptions of Additional Supplementary Files**

### **Supplementary Data 1**

**Description:** IP-MS analysis

### **Supplementary Data 2**

**Description:** Commonly up-regulated genes in BPC complex mutants
